# Supplementary material for: The Effect of Statins on the Incidence and Prognosis of Bladder Cancer: A Systematic Review and Meta-Analysis
Source: MDPI journal article supplement (doi:10.3390/curroncol30070488), 2023-07-12
Supplement: s1 [file s1]

# The Effect of Statins on Incidence and Prognosis of Bladder Cancer: A Systematic Review and Meta-Analysis

## Supplementary material

**Supplementary Table S1.** PICOS criteria for inclusion and exclusion of studies

| Parameter    | Inclusion Criteria                                                                | Exclusion Criteria                                                             |
|--------------|-----------------------------------------------------------------------------------|--------------------------------------------------------------------------------|
| Population   | All patients receiving statins (age >18 years)                                    | Patients not receiving statins                                                 |
| Intervention | Administration of statins, alone or in conjunction with background treatment      | Other interventions                                                            |
| Comparator   | Placebo, controls, or any other intervention                                      | Does not apply                                                                 |
| Outcome      | Effect on bladder cancer (incidence or prognosis)                                 | Other outcomes or lack of data regarding effects of statins on bladder cancer. |
| Study Design | Randomized control trials, case-control, and cohort studies, published in English | Other study designs<br>Published in any other language than English            |

**Supplementary Table S2.** Excluded studies with reasons

| First Author      | Year | Reason of Exclusion                                                             |
|-------------------|------|---------------------------------------------------------------------------------|
| Ford I [12]       | 2007 | UBC data not reported separately.                                               |
| Tseng CH [13]     | 2011 | No data for statin use.                                                         |
| Atmaca [14]       | 2014 | Does not meet study design inclusion criteria.                                  |
| Ozgur BC [15]     | 2014 | Does not meet study design inclusion criteria.                                  |
| Fujimoto M [16]   | 2015 | No data for UBC.                                                                |
| Berger SV [17]    | 2016 | No data for UBC.                                                                |
| Hu YB [18]        | 2018 | No data for UBC.                                                                |
| Roy S [19]        | 2018 | Statin use not reported. Insufficient data for UBC patients.                    |
| Giugliano RP [20] | 2020 | Comparator does not meet criteria.                                              |
| Bedimo RJ [21]    | 2021 | No data for UBC.                                                                |
| Okada S [22]      | 2021 | No data for UBC.                                                                |
| Marrone MT [23]   | 2021 | UBC data not reported separately.                                               |
| Yeh JJ [24]       | 2021 | UBC and kidney cancer data reported jointly. No distinct data for UBC reported. |
| Ahn J [25]        | 2022 | UBC and kidney cancer data reported jointly. No distinct data for UBC reported. |
| Stepien K [26]    | 2022 | No data for UBC.                                                                |

| First Author                                                                  | Year | Study Design | Statin                               | Statin group (n) | Bladder cancer in statin group (n) | Control group (n) | Bladder cancer in control group (n) |
|-------------------------------------------------------------------------------|------|--------------|--------------------------------------|------------------|------------------------------------|-------------------|-------------------------------------|
| Randomized Controlled Trials                                                  |      |              |                                      |                  |                                    |                   |                                     |
| Clearfield M [27]                                                             | 2001 | RCT          | Lovastatin vs Placebo                | 499              | 1                                  | 498               | 0                                   |
| Strandberg TE[28]                                                             | 2004 | RCT          | Simvastatin vs Placebo               | 2221             | 19                                 | 2223              | 17                                  |
| Heart Protection Study Collaborative Group [29]                               | 2005 | RCT          | Simvastatin vs Placebo               | 10269            | 74                                 | 10267             | 90                                  |
| Rossebø AB [30]                                                               | 2008 | RCT          | Simvastatin-Ezetimibe vs Placebo     | 943              | 7                                  | 929               | 7                                   |
| Cohort Studies                                                                |      |              |                                      |                  |                                    |                   |                                     |
| Sato S [36]                                                                   | 2006 | Cohort       | Pravastatin vs No statin             | 179              | 3                                  | 84                | 0                                   |
| Farwell WR [37]                                                               | 2008 | Cohort       | Any statin vs No statin              | 37248            | 326                                | 25594             | 258                                 |
| Karp I [39]                                                                   | 2008 | Cohort       | Any statin <sup>†</sup> vs No statin | 11338            | 22                                 | 18738             | 73                                  |
| Haukka J [40]                                                                 | 2010 | Cohort       | Any statin vs No statin              | 472481           | 944                                | 472781            | 845                                 |
| Jacobs EJ [41]                                                                | 2011 | Cohort       | Any statin vs No statin              | 23563§           | 405§                               | 104305            | 633                                 |
| Halámková Jana [42]                                                           | 2022 | Cohort       | Any statin vs No statin              | 52               | 6                                  | 304               | 11                                  |
| List of studies included in the meta-analysis with extracted population data. |      |              |                                      |                  |                                    |                   |                                     |
| † Statins include atorvastatin, fluvastatin, lovastatin, simvastatin.         |      |              |                                      |                  |                                    |                   |                                     |
| § Population used included only current users.                                |      |              |                                      |                  |                                    |                   |                                     |
